# Supplementary material for: Spatial Distribution, Source Analysis and Health Risk Study of Heavy Metals in the Liujiang River Basin in Different Seasons
Source: MDPI journal article supplement (doi:10.3390/ijerph192315435), 2022-11-22
Supplement: s1 [file s1]

**Table S1.** Distributions of parameters for the health risk assessment of heavy metals [31,35,69,70].

|    | adults                 | children             |
|----|------------------------|----------------------|
| IR | 2.2 L/day              | 1 L/day              |
| ED | 70 years               | 6 years              |
| Bw | 65.3 kg                | 21.3 kg              |
| SA | 18,000 cm <sup>2</sup> | 6600 cm <sup>2</sup> |
| ET | 0.58 h/day             | 1 h/day              |
| EF | 365 days/year          |                      |
| CF | $1 \times 10^{-3}$     |                      |

**Table S2.** Reference dose (RfD) and dermal permeability coefficient in samples (Kp), and slope factor (SF) of heavy metal(loid)s used for health risk assessment. [30,31,37,54,71]

|    | RfD <sub>ingestion</sub> (ug/kg/day) | RfD <sub>dermal</sub> (ug/kg/day) | Kp (cm/h)          | SF <sub>ingestion</sub><br>(mg/kg/d) <sup>-1</sup> | SF <sub>dermal</sub><br>(mg/kg/d) <sup>-1</sup> |
|----|--------------------------------------|-----------------------------------|--------------------|----------------------------------------------------|-------------------------------------------------|
| Mn | 140                                  | 0.96                              | $1 \times 10^{-3}$ | –                                                  | –                                               |
| Ni | 20                                   | 0.8                               | $2 \times 10^{-4}$ | 1.7                                                | 42.5                                            |
| Pb | 1.4                                  | 0.42                              | $1 \times 10^{-4}$ | $8.5 \times 10^{-3}$                               | 0.073                                           |
| Zn | 300                                  | 60                                | $6 \times 10^{-4}$ | –                                                  | –                                               |
| As | 0.3                                  | 0.123                             | $1 \times 10^{-3}$ | 1.5                                                | 1.5                                             |
| Cr | 3                                    | 0.075                             | $1 \times 10^{-3}$ | 0.5                                                | 20                                              |
| Cd | 0.5                                  | 0.025                             | $1 \times 10^{-3}$ | 6.1                                                | 0.38                                            |
| Cu | 5                                    | 8                                 | $1 \times 10^{-3}$ | –                                                  | –                                               |
| Co | 300                                  | 0.06                              | $4 \times 10^{-4}$ | –                                                  | –                                               |
| Hg | 0.3                                  | 0.021                             | $1 \times 10^{-3}$ | –                                                  | –                                               |
| Al | 0.4                                  | 200                               | $1 \times 10^{-3}$ | –                                                  | –                                               |

**Table S3.** Reference dose, Hazard quotient and cancer risk for each element of the Liujiang River, China.

| Elem<br>ent          | HI <sub>ingestion</sub> |                        | HI <sub>dermal</sub>   |                        | THI                    |                        | Cancer<br>risk <sub>ingestion</sub> |                        | Cancer risk <sub>dermal</sub> |                        | TCR                    |                        |
|----------------------|-------------------------|------------------------|------------------------|------------------------|------------------------|------------------------|-------------------------------------|------------------------|-------------------------------|------------------------|------------------------|------------------------|
|                      | Adult                   | Child                  | Adult                  | Child                  | Adult                  | Child                  | Adult                               | Child                  | Adult                         | Child                  | Adult                  | Child                  |
| (a) Dry season in R1 |                         |                        |                        |                        |                        |                        |                                     |                        |                               |                        |                        |                        |
| As                   | $1.477 \times 10^{-1}$  | $2.058 \times 10^{-1}$ | $1.709 \times 10^{-3}$ | $3.312 \times 10^{-3}$ | $1.494 \times 10^{-1}$ | $2.091 \times 10^{-1}$ | $6.645 \times 10^{-5}$              | $9.260 \times 10^{-5}$ | $3.153 \times 10^{-7}$        | $6.111 \times 10^{-7}$ | $6.676 \times 10^{-5}$ | $9.321 \times 10^{-5}$ |
| Cd                   | $9.613 \times 10^{-3}$  | $1.340 \times 10^{-2}$ | $9.124 \times 10^{-4}$ | $1.768 \times 10^{-3}$ | $1.053 \times 10^{-2}$ | $1.517 \times 10^{-2}$ | $2.932 \times 10^{-5}$              | $4.086 \times 10^{-5}$ | $8.668 \times 10^{-9}$        | $1.680 \times 10^{-8}$ | $2.933 \times 10^{-5}$ | $4.088 \times 10^{-5}$ |
| Zn                   | $1.602 \times 10^{-3}$  | $5.342 \times 10^{-3}$ | $1.637 \times 10^{-5}$ | $3.173 \times 10^{-5}$ | $1.619 \times 10^{-3}$ | $5.373 \times 10^{-3}$ |                                     |                        |                               |                        |                        |                        |

|    |                        |                        |                        |                        |                        |                        |                        |                        |                        |                        |                        |                        |
|----|------------------------|------------------------|------------------------|------------------------|------------------------|------------------------|------------------------|------------------------|------------------------|------------------------|------------------------|------------------------|
| Cr | $1.045 \times 10^{-2}$ | $1.457 \times 10^{-2}$ | $1.985 \times 10^{-3}$ | $3.848 \times 10^{-3}$ | $1.244 \times 10^{-2}$ | $1.842 \times 10^{-2}$ | $1.569 \times 10^{-5}$ | $2.186 \times 10^{-5}$ | $2.978 \times 10^{-6}$ | $5.771 \times 10^{-6}$ | $1.867 \times 10^{-5}$ | $2.763 \times 10^{-5}$ |
| Cu | $4.849 \times 10^{-3}$ | $6.757 \times 10^{-3}$ | $1.438 \times 10^{-5}$ | $2.787 \times 10^{-5}$ | $4.863 \times 10^{-3}$ | $6.784 \times 10^{-3}$ |                        |                        |                        |                        |                        |                        |
| Mn | $4.481 \times 10^{-5}$ | $6.244 \times 10^{-5}$ | $3.101 \times 10^{-5}$ | $6.010 \times 10^{-5}$ | $7.582 \times 10^{-5}$ | $1.225 \times 10^{-4}$ |                        |                        |                        |                        |                        |                        |
| Ni | $1.522 \times 10^{-3}$ | $2.121 \times 10^{-3}$ | $3.611 \times 10^{-3}$ | $6.999 \times 10^{-3}$ | $1.558 \times 10^{-3}$ | $2.191 \times 10^{-3}$ | $5.175 \times 10^{-5}$ | $7.211 \times 10^{-5}$ | $1.228 \times 10^{-6}$ | $2.380 \times 10^{-6}$ | $5.297 \times 10^{-5}$ | $7.449 \times 10^{-5}$ |
| Co | $1.719 \times 10^{-5}$ | $5.729 \times 10^{-5}$ | $1.170 \times 10^{-4}$ | $2.269 \times 10^{-4}$ | $1.342 \times 10^{-4}$ | $2.841 \times 10^{-4}$ |                        |                        |                        |                        |                        |                        |
| Al | $3.616 \times 10^{-1}$ | $5.039 \times 10^{-1}$ | $3.432 \times 10^{-6}$ | $6.652 \times 10^{-6}$ | $3.616 \times 10^{-1}$ | $5.039 \times 10^{-1}$ |                        |                        |                        |                        |                        |                        |
| Pb | $4.731 \times 10^{-3}$ | $6.593 \times 10^{-3}$ | $7.484 \times 10^{-6}$ | $1.450 \times 10^{-5}$ | $4.739 \times 10^{-3}$ | $6.607 \times 10^{-3}$ | $5.630 \times 10^{-8}$ | $7.846 \times 10^{-8}$ | $2.295 \times 10^{10}$ | $4.447 \times 10^{10}$ | $5.653 \times 10^{-8}$ | $7.890 \times 10^{-8}$ |
| Hg | $2.489 \times 10^{-5}$ | $3.469 \times 10^{-5}$ | $1.688 \times 10^{-3}$ | $3.271 \times 10^{-3}$ | $1.712 \times 10^{-3}$ | $3.305 \times 10^{-3}$ |                        |                        |                        |                        |                        |                        |

(a) Wet season in R1

|    |                        |                        |                        |                        |                        |                        |                        |                        |                         |                         |                        |                        |
|----|------------------------|------------------------|------------------------|------------------------|------------------------|------------------------|------------------------|------------------------|-------------------------|-------------------------|------------------------|------------------------|
| As | $7.786 \times 10^{-2}$ | $1.085 \times 10^{-1}$ | $9.012 \times 10^{-4}$ | $1.747 \times 10^{-3}$ | $7.876 \times 10^{-2}$ | $1.102 \times 10^{-1}$ | $3.504 \times 10^{-5}$ | $4.883 \times 10^{-5}$ | $1.663 \times 10^{-7}$  | $3.222 \times 10^{-7}$  | $3.520 \times 10^{-5}$ | $4.915 \times 10^{-5}$ |
| Zn | $2.347 \times 10^{-4}$ | $7.825 \times 10^{-4}$ | $2.398 \times 10^{-6}$ | $4.648 \times 10^{-6}$ | $2.371 \times 10^{-4}$ | $7.871 \times 10^{-4}$ |                        |                        |                         |                         |                        |                        |
| Cr | $6.789 \times 10^{-3}$ | $9.461 \times 10^{-3}$ | $1.289 \times 10^{-3}$ | $2.498 \times 10^{-3}$ | $8.078 \times 10^{-3}$ | $1.196 \times 10^{-2}$ | $1.018 \times 10^{-5}$ | $1.419 \times 10^{-5}$ | $1.933 \times 10^{-6}$  | $3.746 \times 10^{-6}$  | $1.212 \times 10^{-5}$ | $1.794 \times 10^{-5}$ |
| Cu | $5.045 \times 10^{-3}$ | $7.031 \times 10^{-3}$ | $1.496 \times 10^{-5}$ | $2.900 \times 10^{-5}$ | $5.060 \times 10^{-3}$ | $7.060 \times 10^{-3}$ |                        |                        |                         |                         |                        |                        |
| Mn | $1.194 \times 10^{-4}$ | $1.665 \times 10^{-4}$ | $8.269 \times 10^{-5}$ | $1.603 \times 10^{-4}$ | $2.022 \times 10^{-4}$ | $3.268 \times 10^{-4}$ |                        |                        |                         |                         |                        |                        |
| Ni | $1.318 \times 10^{-3}$ | $1.837 \times 10^{-3}$ | $3.127 \times 10^{-5}$ | $6.061 \times 10^{-5}$ | $1.349 \times 10^{-3}$ | $1.897 \times 10^{-3}$ | $4.481 \times 10^{-5}$ | $6.245 \times 10^{-5}$ | $1.063 \times 10^{-6}$  | $2.061 \times 10^{-6}$  | $4.588 \times 10^{-5}$ | $6.451 \times 10^{-5}$ |
| Al | $7.391 \times 10^0$    | $1.030 \times 10^1$    | $7.015 \times 10^{-5}$ | $1.359 \times 10^{-4}$ | $7.391 \times 10^0$    | $1.030 \times 10^0$    |                        |                        |                         |                         |                        |                        |
| Pb | $1.592 \times 10^{-3}$ | $2.219 \times 10^{-3}$ | $2.519 \times 10^{-6}$ | $4.883 \times 10^{-6}$ | $1.595 \times 10^{-3}$ | $2.224 \times 10^{-3}$ | $1.895 \times 10^{-8}$ | $2.641 \times 10^{-8}$ | $7.724 \times 10^{-11}$ | $1.497 \times 10^{-10}$ | $1.903 \times 10^{-8}$ | $2.656 \times 10^{-8}$ |

(b) Dry season in R2

|    |                        |                        |                        |                        |                        |                        |                        |                        |                        |                        |                        |                        |
|----|------------------------|------------------------|------------------------|------------------------|------------------------|------------------------|------------------------|------------------------|------------------------|------------------------|------------------------|------------------------|
| As | $1.650 \times 10^{-1}$ | $2.300 \times 10^{-1}$ | $1.911 \times 10^{-3}$ | $3.703 \times 10^{-3}$ | $1.670 \times 10^{-1}$ | $2.337 \times 10^{-1}$ | $7.428 \times 10^{-5}$ | $1.035 \times 10^{-4}$ | $3.525 \times 10^{-7}$ | $6.832 \times 10^{-7}$ | $7.463 \times 10^{-5}$ | $1.041 \times 10^{-4}$ |
| Cd | $1.028 \times 10^{-2}$ | $1.432 \times 10^{-2}$ | $9.755 \times 10^{-4}$ | $1.891 \times 10^{-3}$ | $1.125 \times 10^{-2}$ | $1.621 \times 10^{-2}$ | $3.135 \times 10^{-5}$ | $4.368 \times 10^{-5}$ | $9.267 \times 10^{-9}$ | $1.796 \times 10^{-8}$ | $3.136 \times 10^{-5}$ | $4.370 \times 10^{-5}$ |
| Zn | $5.252 \times 10^{-4}$ | $1.751 \times 10^{-3}$ | $5.366 \times 10^{-6}$ | $1.040 \times 10^{-5}$ | $5.306 \times 10^{-4}$ | $1.761 \times 10^{-3}$ |                        |                        |                        |                        |                        |                        |

|    |                        |                        |                        |                        |                        |                        |                        |                        |                         |                         |                        |                        |
|----|------------------------|------------------------|------------------------|------------------------|------------------------|------------------------|------------------------|------------------------|-------------------------|-------------------------|------------------------|------------------------|
| Cr | $1.187 \times 10^{-2}$ | $1.654 \times 10^{-2}$ | $2.254 \times 10^{-3}$ | $4.368 \times 10^{-3}$ | $1.413 \times 10^{-2}$ | $2.091 \times 10^{-2}$ | $1.781 \times 10^{-5}$ | $2.482 \times 10^{-5}$ | $3.380 \times 10^{-6}$  | $6.551 \times 10^{-6}$  | $2.119 \times 10^{-5}$ | $3.137 \times 10^{-5}$ |
| Cu | $3.777 \times 10^{-3}$ | $5.264 \times 10^{-3}$ | $1.120 \times 10^{-5}$ | $2.171 \times 10^{-5}$ | $3.789 \times 10^{-3}$ | $5.285 \times 10^{-3}$ |                        |                        |                         |                         |                        |                        |
| Mn | $9.792 \times 10^{-5}$ | $1.364 \times 10^{-4}$ | $6.776 \times 10^{-5}$ | $1.313 \times 10^{-4}$ | $1.657 \times 10^{-4}$ | $2.678 \times 10^{-4}$ |                        |                        |                         |                         |                        |                        |
| Ni | $1.659 \times 10^{-3}$ | $2.312 \times 10^{-3}$ | $3.937 \times 10^{-5}$ | $7.630 \times 10^{-5}$ | $1.699 \times 10^{-3}$ | $2.388 \times 10^{-3}$ | $5.641 \times 10^{-5}$ | $7.861 \times 10^{-5}$ | $1.339 \times 10^{-6}$  | $2.594 \times 10^{-6}$  | $5.775 \times 10^{-5}$ | $8.121 \times 10^{-5}$ |
| Co | $1.835 \times 10^{-5}$ | $6.117 \times 10^{-5}$ | $1.245 \times 10^{-4}$ | $2.422 \times 10^{-4}$ | $1.433 \times 10^{-4}$ | $3.034 \times 10^{-4}$ |                        |                        |                         |                         |                        |                        |
| Al | $9.294 \times 10^{-1}$ | $1.295 \times 10^0$    | $8.821 \times 10^{-6}$ | $1.710 \times 10^{-5}$ | $9.294 \times 10^{-1}$ | $1.295 \times 10^0$    |                        |                        |                         |                         |                        |                        |
| Pb | $3.802 \times 10^{-3}$ | $5.298 \times 10^{-3}$ | $6.014 \times 10^{-6}$ | $1.166 \times 10^{-5}$ | $3.808 \times 10^{-3}$ | $5.310 \times 10^{-3}$ | $4.525 \times 10^{-8}$ | $6.305 \times 10^{-8}$ | $1.844 \times 10^{-10}$ | $3.574 \times 10^{-10}$ | $4.543 \times 10^{-8}$ | $6.341 \times 10^{-8}$ |
| Hg | $3.286 \times 10^{-5}$ | $4.579 \times 10^{-5}$ | $2.228 \times 10^{-3}$ | $4.318 \times 10^{-3}$ | $2.261 \times 10^{-3}$ | $4.363 \times 10^{-3}$ |                        |                        |                         |                         |                        |                        |

(d) Wet season in R2

|    |                        |                        |                        |                        |                        |                        |                        |                        |                         |                         |                         |                        |
|----|------------------------|------------------------|------------------------|------------------------|------------------------|------------------------|------------------------|------------------------|-------------------------|-------------------------|-------------------------|------------------------|
| As | $7.210 \times 10^{-2}$ | $1.005 \times 10^{-1}$ | $8.345 \times 10^{-4}$ | $1.617 \times 10^{-3}$ | $7.293 \times 10^{-2}$ | $1.021 \times 10^{-1}$ | $3.244 \times 10^{-5}$ | $4.521 \times 10^{-5}$ | $1.540 \times 10^{-7}$  | $2.984 \times 10^{-7}$  | $3.260 \times 10^{-5}$  | $4.551 \times 10^{-5}$ |
| Zn | $1.565 \times 10^{-4}$ | $5.216 \times 10^{-4}$ | $1.599 \times 10^{-6}$ | $3.099 \times 10^{-6}$ | $1.581 \times 10^{-4}$ | $5.247 \times 10^{-4}$ |                        |                        |                         |                         |                         |                        |
| Cr | $8.018 \times 10^{-3}$ | $1.117 \times 10^{-2}$ | $1.522 \times 10^{-3}$ | $2.950 \times 10^{-3}$ | $9.540 \times 10^{-3}$ | $1.412 \times 10^{-2}$ | $1.203 \times 10^{-5}$ | $1.676 \times 10^{-5}$ | $2.283 \times 10^{-6}$  | $4.425 \times 10^{-6}$  | $1.431 \times 10^{-5}$  | $2.119 \times 10^{-5}$ |
| Cu | $5.152 \times 10^{-3}$ | $7.180 \times 10^{-3}$ | $1.528 \times 10^{-5}$ | $2.962 \times 10^{-5}$ | $5.168 \times 10^{-3}$ | $7.210 \times 10^{-3}$ |                        |                        |                         |                         |                         |                        |
| Mn | $1.562 \times 10^{-4}$ | $2.177 \times 10^{-4}$ | $1.081 \times 10^{-4}$ | $2.095 \times 10^{-4}$ | $2.643 \times 10^{-4}$ | $4.272 \times 10^{-4}$ |                        |                        |                         |                         |                         |                        |
| Ni | $1.494 \times 10^{-3}$ | $2.081 \times 10^{-3}$ | $3.544 \times 10^{-5}$ | $6.869 \times 10^{-5}$ | $1.529 \times 10^{-3}$ | $2.150 \times 10^{-3}$ | $5.078 \times 10^{-5}$ | $7.077 \times 10^{-5}$ | $1.205 \times 10^{-6}$  | $2.335 \times 10^{-6}$  | $5.199 \times 10^{-5}$  | $7.310 \times 10^{-5}$ |
| Al | $6.685 \times 10^0$    | $9.316 \times 10^0$    | $6.345 \times 10^{-5}$ | $1.230 \times 10^{-4}$ | $6.686 \times 10^0$    | $9.316 \times 10^0$    |                        |                        |                         |                         |                         |                        |
| Pb | $6.240 \times 10^{-4}$ | $8.697 \times 10^{-4}$ | $9.872 \times 10^{-7}$ | $1.913 \times 10^{-6}$ | $6.251 \times 10^{-4}$ | $8.716 \times 10^{-4}$ | $7.427 \times 10^{-9}$ | $1.035 \times 10^{-8}$ | $3.027 \times 10^{-11}$ | $5.866 \times 10^{-11}$ | $7.457 \times 10^{-11}$ | $1.041 \times 10^{-8}$ |

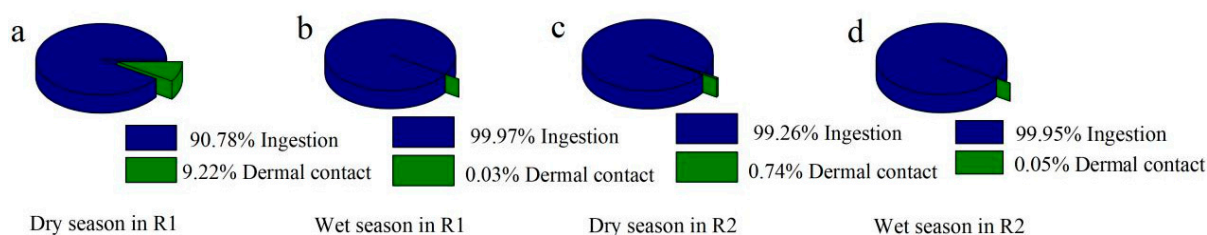

**Figure S1:** Contribution of various routes to HI. (a) Contribution of ingestion and dermal pathways at the R1 sampling site during the dry season; (b) Contribution of ingestion and dermal pathways at sampling point R1 in the wet season; (c) Contribution of ingestion and dermal pathways at sampling point R2 during the dry season; (d) Contribution of ingestion and dermal pathways at sampling point R2 during the wet season.

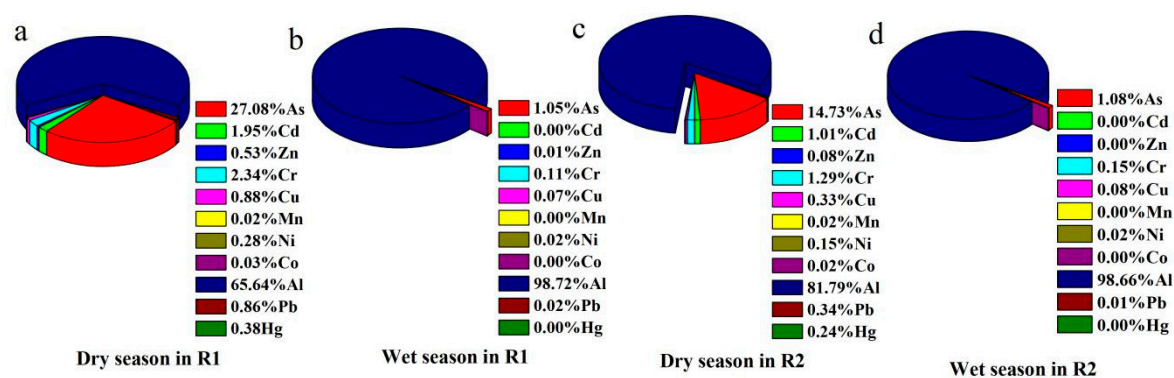

**Figure S2:** Contribution of different metals to HI in sample station. (a) Contribution of different metals to HI at the R1 sampling site during the dry season; (b) Contribution of different metals to HI at sampling point R1 in the wet season; (c) Contribution of different metals to HI at sampling point R2 during the dry season; (d) Contribution of different metals to HI at sampling point R2 during the wet season.
